# Supplementary material for: Multiple Sex-Associated Regions and a Putative Sex Chromosome in Zebrafish Revealed by RAD Mapping and Population Genomics
Source: PLoS One. 2012 Jul 9;7(7):e40701. doi: 10.1371/journal.pone.0040701 (PMC3392230; doi:10.1371/journal.pone.0040701)
Supplement: Table S7 — Genomic locations of candidate genes for sex determination in the zebrafish genome (genome assembly Zv9, Ensembl version 65). (XLSX) [file pone.0040701.s009.xlsx]

## Sheet: Sheet1
Table S7. Genomic locations of candidate genes for sex determination in the zebrafish genome (genome assembly Zv9, Ensembl version 65).
gene name	Ensembl Gene ID	chromosome	start	end	strand
fgf20a	ENSDARG00000007356	1	15134972	15136368	-1
nos1 (nanos3)	ENSDARG00000068255	1	55787173	55788301	-1
rec8 (2 of 2)	ENSDARG00000078329	2	5854588	5874907	-1
zpc (zp3b)	ENSDARG00000039828	2	5895636	5901186	1
rxrga	ENSDARG00000095862	2	20495131	20546256	1
e2f5a	ENSDARG00000038812	2	31392512	31402125	-1
elavl1	ENSDARG00000038695	2	36844171	36855031	-1
hsd17b1	ENSDARG00000027469	3	17769528	17776030	-1
rarab	ENSDARG00000034893	3	33201407	33312201	-1
sox9b	ENSDARG00000043923	3	63179328	63184452	-1
sox5	ENSDARG00000011582	4	16050433	16124134	-1
ar	ENSDARG00000067976	5	37179505	37297038	1
fsta	ENSDARG00000052846	5	42130049	42135527	-1
fancg	ENSDARG00000024967	5	43115072	43127921	1
dmrt1	ENSDARG00000007349	5	46563399	46609926	1
dmrt3	ENSDARG00000035290	5	46619179	46622445	1
dmrt2a	ENSDARG00000015072	5	46626544	46629698	1
rxrab	ENSDARG00000035127	5	68053454	68088764	-1
inha	ENSDARG00000052433	6	22753115	22776280	-1
dmrt2b	ENSDARG00000070013	6	35599989	35606659	1
stau1	ENSDARG00000044182	6	46369038	46392004	1
aldh1a3	ENSDARG00000076933	7	10543165	10624894	-1
cyp26b1	ENSDARG00000077121	7	26490839	26515694	1
aldh1a2	ENSDARG00000053493	7	31663564	31704037	-1
bmp15	ENSDARG00000037491	7	53223523	53230868	-1
fem1c	ENSDARG00000013375	8	448287	462096	1
dmrt5 (dmrta2)	ENSDARG00000039412	8	16776620	16778463	-1
ff1b (nr5a1a)	ENSDARG00000017704	8	54820581	54858194	1
vasa	ENSDARG00000014373	10	6548795	6570246	1
fstb	ENSDARG00000057992	10	9058688	9067308	1
ptgds (1 of 2)	ENSDARG00000069439	10	10754707	10762832	1
rargb	ENSDARG00000054003	11	1991815	2049041	1
dax1 (nr0b1)	ENSDARG00000056541	11	30559749	30562664	-1
wnt4a	ENSDARG00000071208	11	40401494	40436562	-1
sox9a	ENSDARG00000003293	12	2151822	2157414	-1
cyp26a1	ENSDARG00000033999	12	9708963	9712555	-1
raraa	ENSDARG00000056783	12	12186820	12263281	1
dmc1	ENSDARG00000055883	12	20452905	20458468	1
emx2	ENSDARG00000039701	13	19367592	19372563	1
fancl	ENSDARG00000007885	13	26927787	27004687	1
sdf1a (cxcl12a)	ENSDARG00000037116	13	31027969	31043317	1
fgfr2	ENSDARG00000058115	13	46909744	47040495	-1
lhcgr	ENSDARG00000026081	13	48032594	48078036	1
dnd	ENSDARG00000022813	14	7366001	7377476	-1
fgf16	ENSDARG00000042233	14	10951124	10961218	-1
gdf9	ENSDARG00000003229	14	23460195	23467148	1
fgf20b	ENSDART00000131174	14	31361519	31362718	1
atm	ENSDARG00000002385	15	6400174	6503351	-1
atm	ENSDARG00000063465	15	6547961	6579129	1
foxl2	ENSDARG00000042180	15	6982388	6985848	1
lhx1a	ENSDARG00000014018	15	27052293	27059459	-1
cyp21a2	ENSDARG00000037550	16	18626478	18639394	1
rxrbb	ENSDARG00000002006	16	20493224	20528393	1
wnt4b	ENSDARG00000040159	16	34024131	34034946	1
rspo1	ENSDARG00000039957	16	36087312	36131543	-1
zfpm2a	ENSDARG00000040123	16	46671678	46980291	-1
cyp11b (cyp11b2)	ENSDARG00000042014	16	57904611	57917200	-1
bmp2a	ENSDARG00000013409	17	4004630	4008908	-1
cyp19a1a	ENSDARG00000041348	18	38057824	38073637	-1
pgr	ENSDARG00000035966	18	40219884	40238456	1
wt1b	ENSDARG00000007990	18	44007258	44031137	-1
rxrba	ENSDARG00000078954	19	7871577	7897380	-1
zfpm2b	ENSDARG00000035997	19	17288407	17381913	1
lrp6	ENSDARG00000076053	19	46978799	47004819	-1
rxrgb	ENSDARG00000004697	20	33899864	33944626	1
bmp2b	ENSDARG00000041430	20	46426777	46432528	-1
gata4	ENSDARG00000035759	20	53586307	53602069	-1
gsdf	ENSDARG00000075301	21	131069	134814	-1
ff1d (nr5a1b)	ENSDARG00000023362	21	7776899	7817498	1
pou5f1 (oct4)	ENSDARG00000044774	21	11887950	11892809	-1
rxraa	ENSDARG00000057737	21	16279759	16459148	1
amh	ENSDARG00000014357	22	21067528	21082105	-1
ff1a (nr5a2)	ENSDARG00000042556	22	22999216	23086984	-1
ziwi (piwil1)	ENSDARG00000041699	22	22999216	23086984	-1
lhx9	ENSDARG00000056979	22	24970015	24979988	-1
sdf1b (cxcl12b)	ENSDARG00000055100	22	27551657	27567596	-1
elavl2	ENSDARG00000040732	22	41211940	41233405	-1
dhh	ENSDARG00000037062	23	27981229	27989699	1
pod1 (tcf21)	ENSDARG00000036869	23	31792848	31794275	-1
rarga	ENSDARG00000034117	23	35898744	36015279	1
rec8 (1 of 2)	ENSDARG00000069260	24	12592132	12636548	1
stau2	ENSDARG00000026801	24	12921719	13144190	1
ptgds (2 of 2)	ENSDARG00000027088	24	17576415	17578479	-1
cyp19a1b	ENSDARG00000009852	25	4903097	4916762	-1
wt1a	ENSDARG00000031420	25	15535281	15571217	-1
sycp3l	ENSDARG00000013438	25	20068120	20075082	-1
dmrt4	absent in zebrafish
fgf9	absent in zebrafish
